# Supplementary material for: Physical Education Teachers’ Opinion about Online Teaching during the COVID-19 Pandemic—Comparative Study of European Countries
Source: MDPI journal article supplement (doi:10.3390/su132111730), 2021-10-23
Supplement: s1 [file s1]

Archive with 1 entries (1 files):
- sustainability-1392659-supplementary.pdf
